# Supplementary material
Source: MDPI journal article supplement (https://www.mdpi.com/2073-4441/7/8/4427)
Supplement: s1 [file s1]

## Supplementary Material

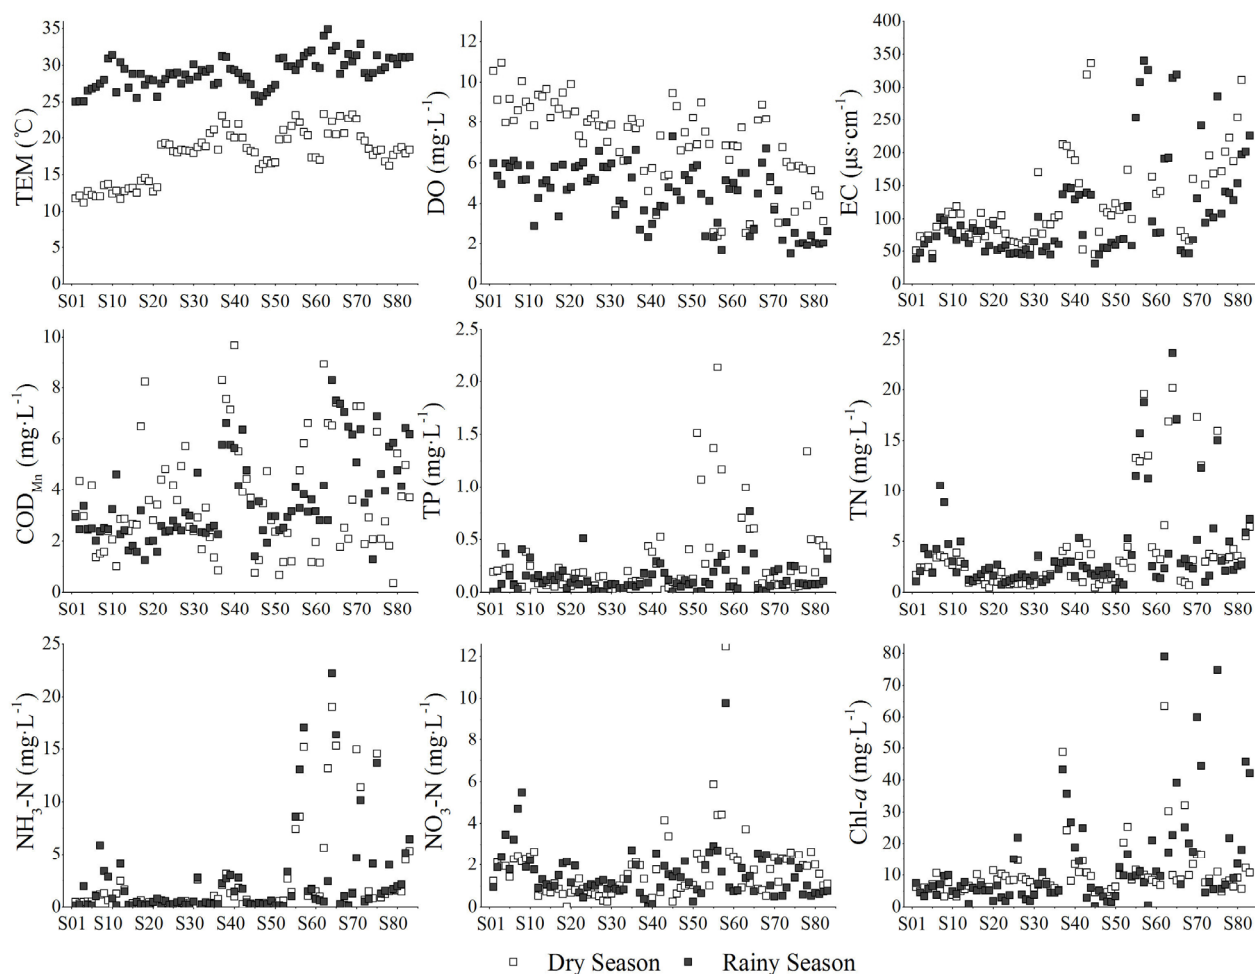

**Figure S1.** Measured values for the water quality parameters of 83 site in the dry and rainy seasons in the Dongjiang River basin.

**Table S1.** Values of environmental quality standards for surface water of China (GB3838-2002) (State Environmental Protection Administration 2002).

| Water quality parameters                | Units              | State standard for surface water |     |     |      |      |
|-----------------------------------------|--------------------|----------------------------------|-----|-----|------|------|
|                                         |                    | I                                | II  | III | IV   | V    |
| water temperature                       | °C                 | a                                | a   | a   | a    | a    |
| dissolved oxygen (DO)                   | mg·L <sup>-1</sup> | 7.5                              | 6.0 | 5.0 | 3.0  | 2.0  |
| permanganate index (COD <sub>Mn</sub> ) | mg·L <sup>-1</sup> | 2.0                              | 4.0 | 6.0 | 10.0 | 15.0 |
| total phosphorus (TP)                   | mg·L <sup>-1</sup> | 0.02                             | 0.1 | 0.2 | 0.3  | 0.4  |
| ammonia nitrogen (NH <sub>3</sub> -N)   | mg·L <sup>-1</sup> | 0.15                             | 0.5 | 1.0 | 1.5  | 2.0  |

Notes: a: Temperature: weekly average increase due to human factor should be (1) summer:  $\leq 1$  °C, (2) winter:  $\leq 2$  °C; Grade I: suitable for river headwaters and national nature reserve areas; Grade II: suitable for first-degree conservation areas of surface water resource for centralized potable drinking water, infrequent hydrobiology habitats, spawning areas of organisms like fish and shrimp, feeding areas of young fish; Grade III: suitable for second-degree conservation areas of surface water resource for centralized potable drinking water, and water areas for fishery and swimming; Grade IV: suitable for areas for industrial water utilization and entertainment, where people do not touch water directly; Grade V: suitable for water areas for agriculture and general landscape.
